# Supplementary material for: Switch on fluorescence mode for determination of l-cysteine with carbon quantum dots and Au nanoparticles as a probe
Source: Royal Society of Chemistry journal article supplement (doi:10.1039/c9ra09019c), 2020-01-01
Supplement: c9ra09019c1.pdf [file c9ra09019c1.pdf]

**Supplementary information**

**Switch on fluorescence mode for determination of L-cysteine with  
carbon quantum dots and Au nanoparticles as a probe**

Yuye Chen <sup>a</sup>, Xiu Qin <sup>a</sup>, Chunling Yuan <sup>a</sup>, Yilin Wang <sup>a, b \*</sup>

<sup>a</sup> *School of Chemistry and Chemical Engineering, Guangxi University, Guangxi Key Laboratory of Biorefinery, Nanning 530004, PR China*

<sup>b</sup> *Guangxi Key Laboratory for Agro-Environment and Agro-Product Safety, Nanning 530004, PR China*

---

\*Corresponding author, Tel: +86 771 3392879

E-mail address: theanalyst@163.com; theanalyst@gxu.edu.cn

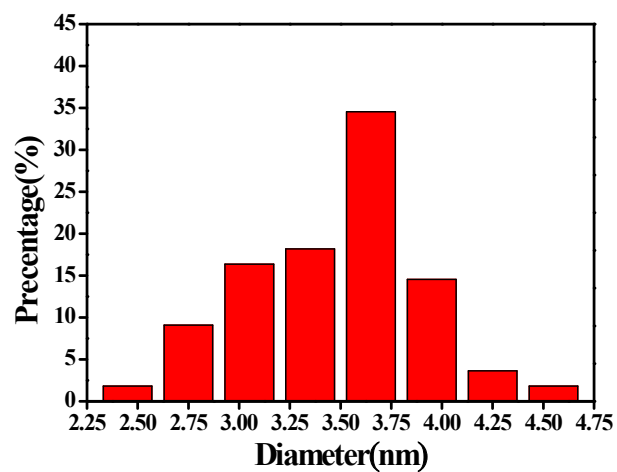

Fig.S1 The size distribution of CQDs

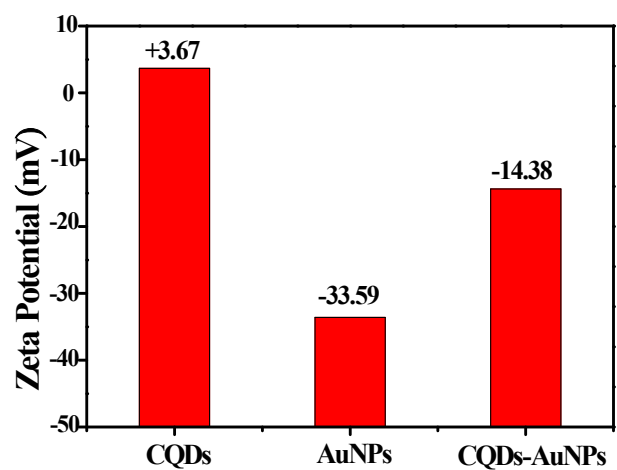

Fig.S2 The zeta potential of CQDs , Au NPs and CQDs-AuNPs.

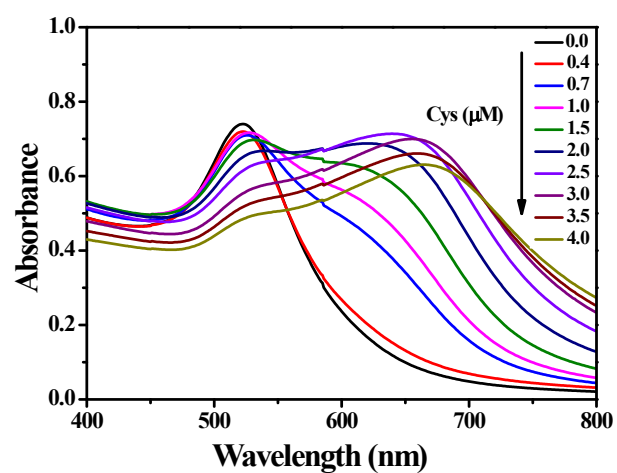

Fig.S3 The absorption spectra of AuNPs in the presence of cysteine at various concentrations.

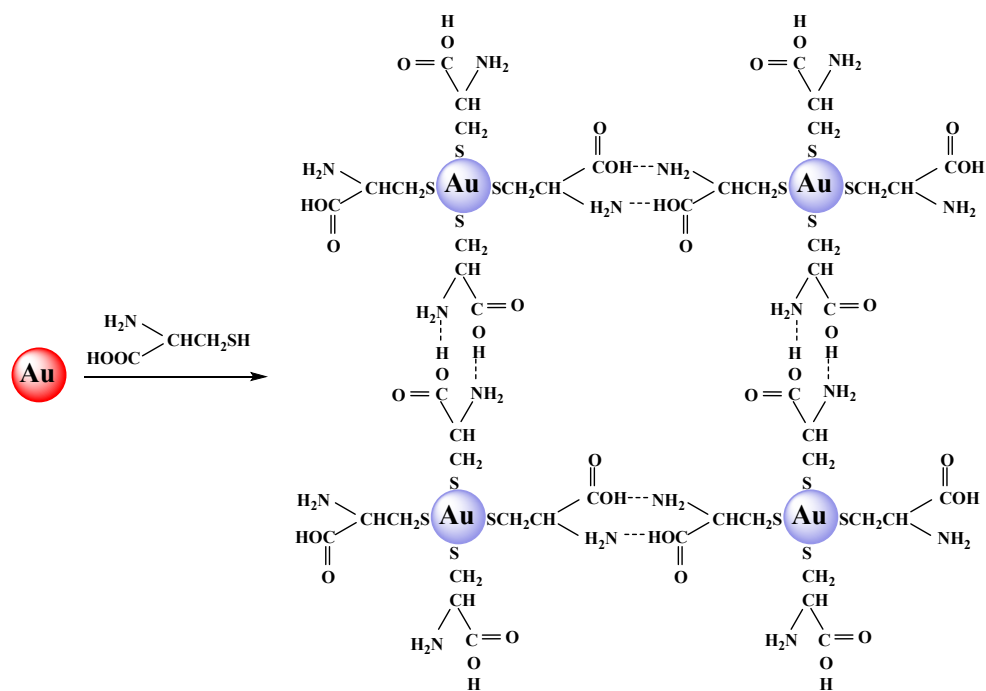

**Fig.S4** The schematic illustration of the aggregation of AuNPs in the presence of cysteine.

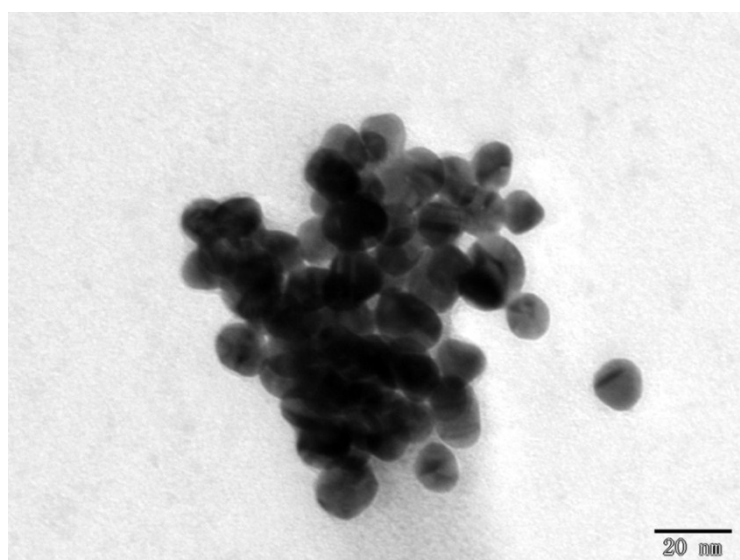

**Fig.S5** TEM image of AuNPs in the presence of cysteine.

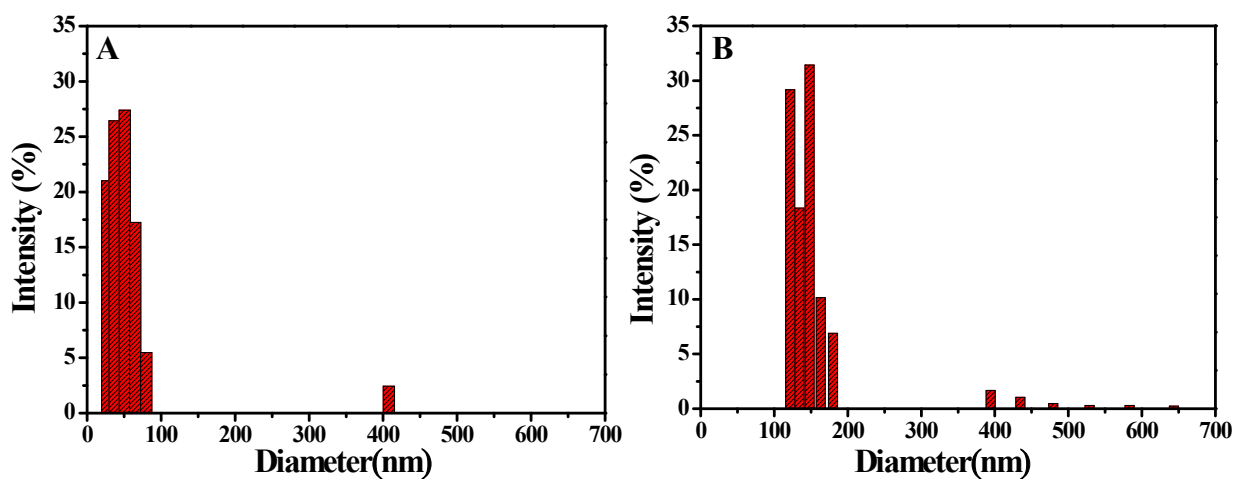

Fig.S6 DLS measurements of CQDs-AuNPs solutions before (A) and after (B) adding Cys.

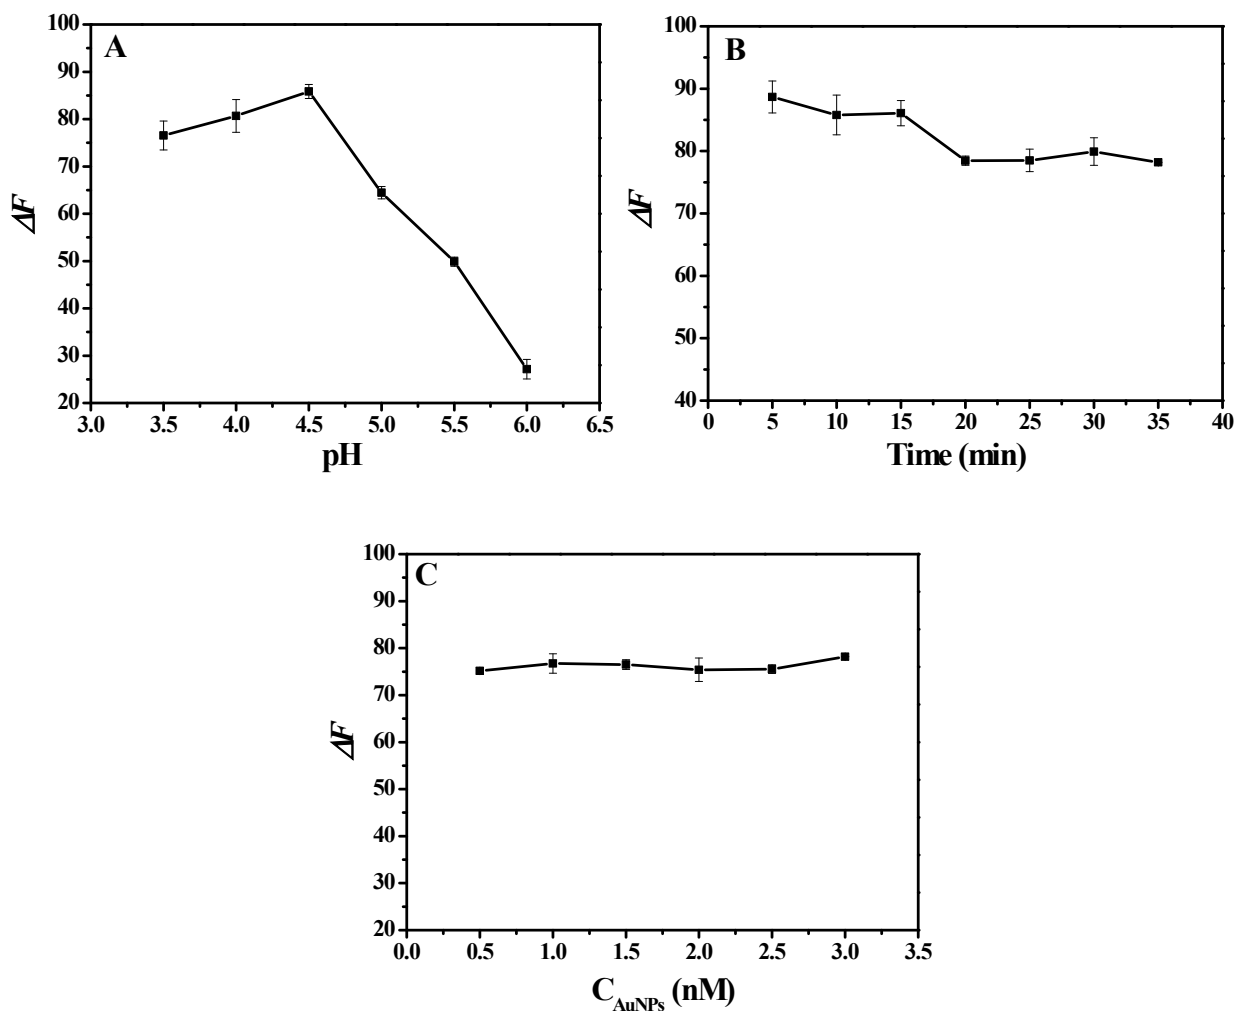

Fig. S7. The effect of (A) pH value (in BR buffer) , (B) incubation time and (C) the concentration of AuNPs on the fluorescence recovery. The concentration of Cys was 2.0 $\mu$ M.
